# Supplementary material for: Controlled syntheses of cubic and hexagonal ZnIn2S4 nanostructures with different visible-light photocatalytic performance
Source: Royal Society of Chemistry journal article supplement (doi:10.1039/c0dt01435d), 2011-01-01
Supplement: c0dt01435d.pdf [file c0dt01435d.pdf]

## Electronic Supporting Information

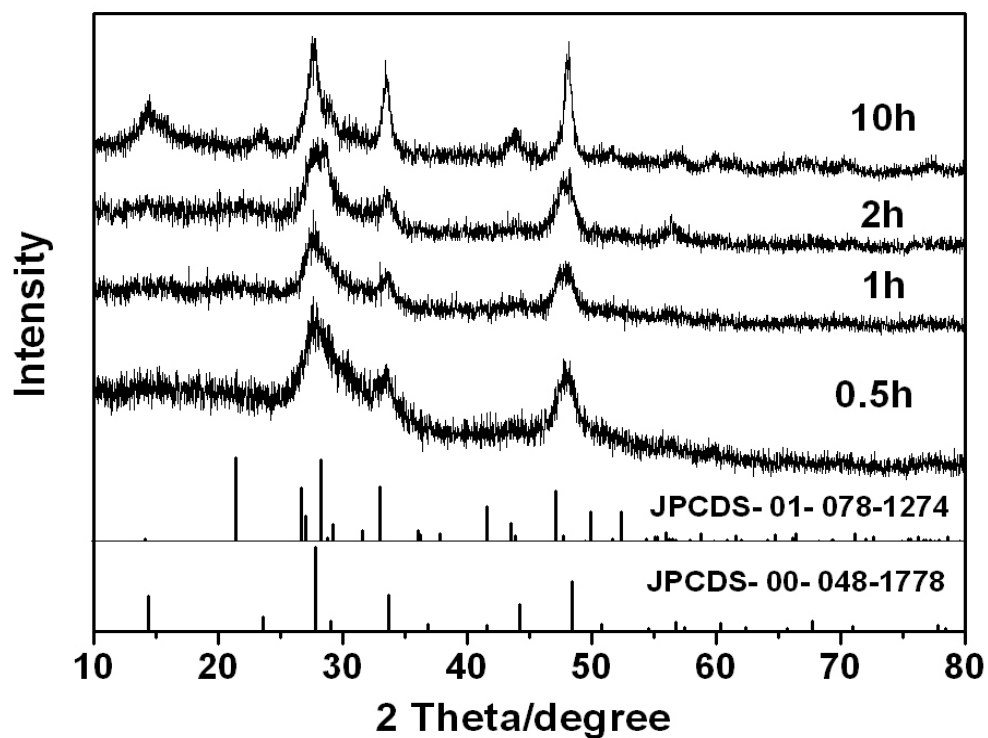

**Fig. S1** XRD pattern of the ZnIn<sub>2</sub>S<sub>4</sub> samples synthesized using Zn(NO<sub>3</sub>)<sub>2</sub> and In(NO<sub>3</sub>)<sub>3</sub> at 120 °C for different reaction time.

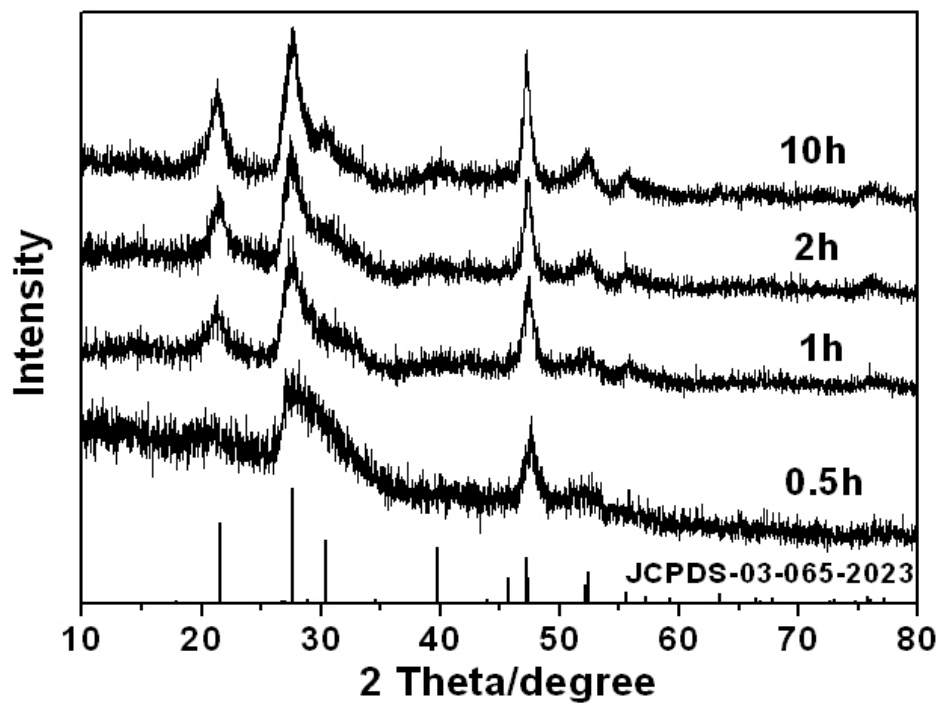

**Fig. S2** XRD pattern of the ZnIn<sub>2</sub>S<sub>4</sub> samples synthesized using ZnCl<sub>2</sub> and InCl<sub>3</sub> at 120 °C for different reaction time.

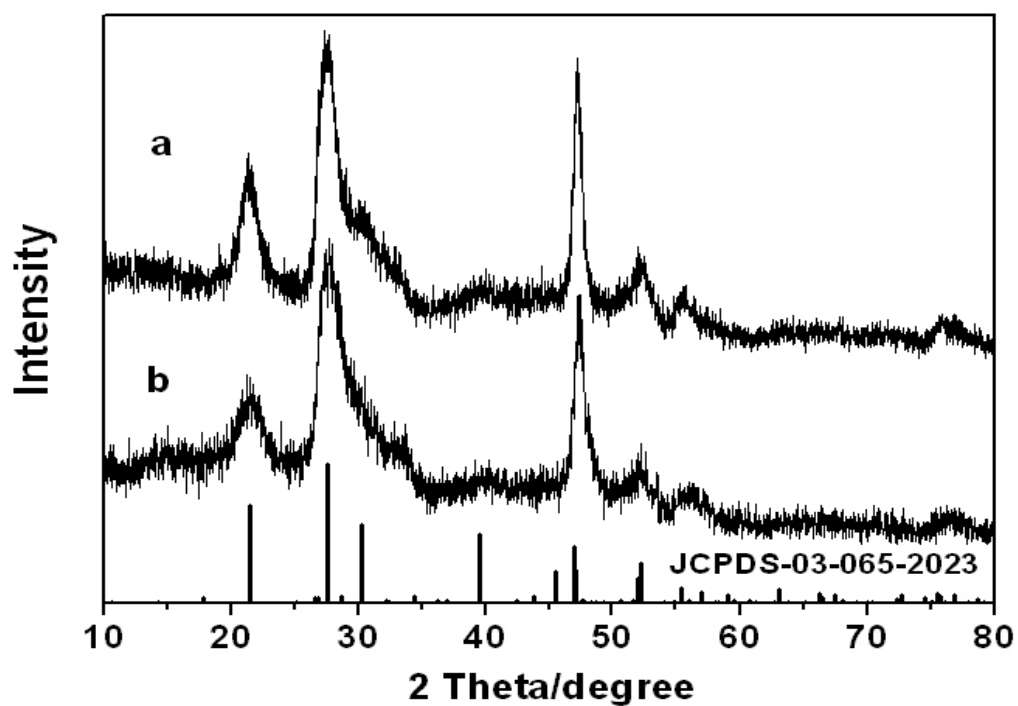

**Fig. S3** XRD pattern of the  $\text{ZnIn}_2\text{S}_4$  samples synthesized using different precursors of  $\text{Zn}(\text{NO}_3)_2$  and  $\text{InCl}_3$  (a),  $\text{ZnCl}_2$  and  $\text{In}(\text{NO}_3)_3$  (b) at  $120\text{ }^\circ\text{C}$  for 10 h.

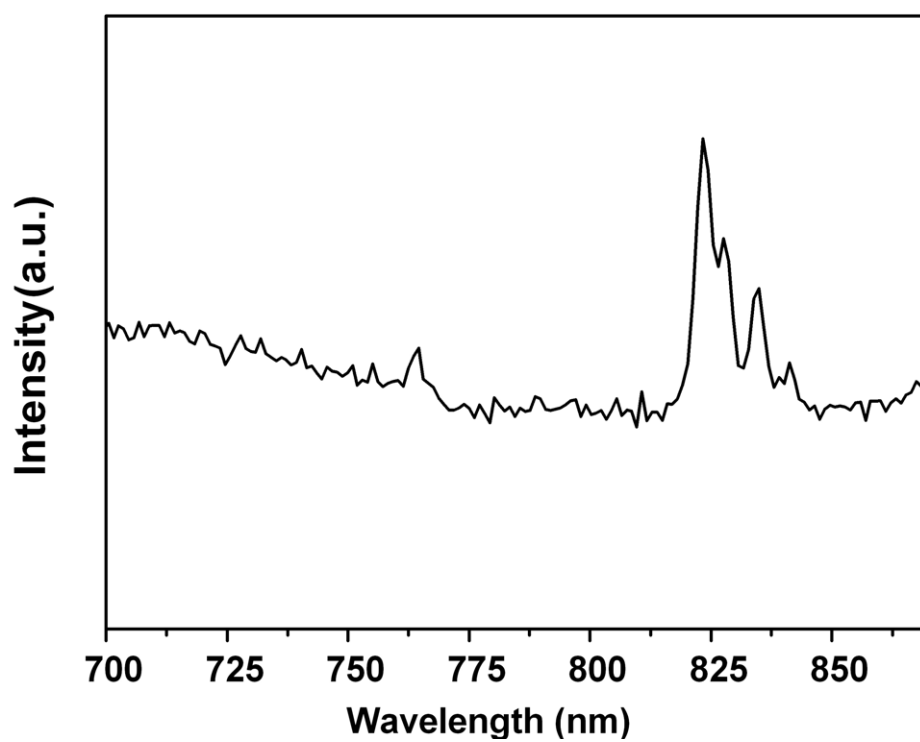

**Fig. S4** Solid-state emission spectra for cubic ZnIn<sub>2</sub>S<sub>4</sub> at 10K (excitation at 579 nm).

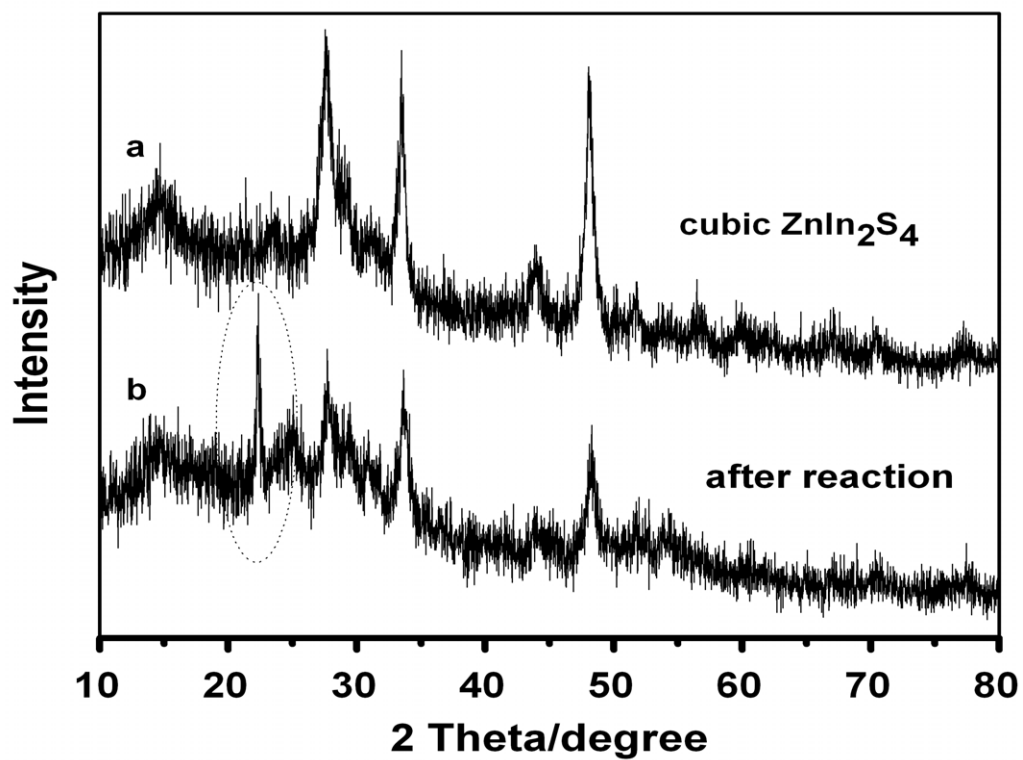

**Fig. S5** XRD patterns of cubic ZnIn<sub>2</sub>S<sub>4</sub>: (a) before photocatalytic reaction; (b) after photocatalytic reaction.

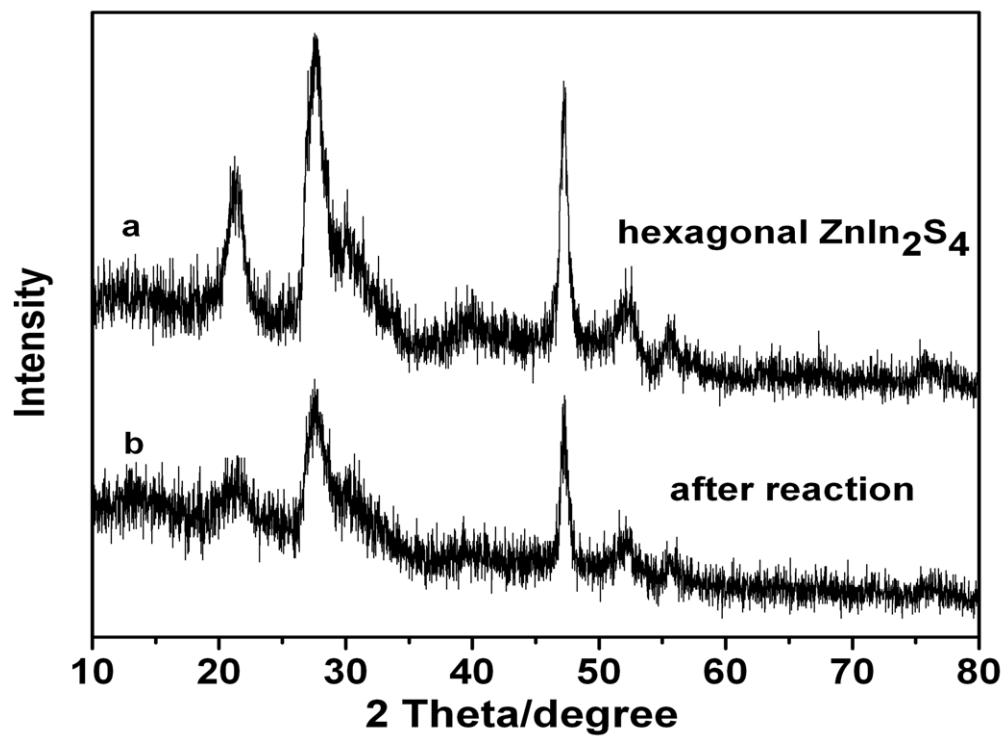

**Fig. S6** XRD patterns of hexagonal ZnIn<sub>2</sub>S<sub>4</sub> (a) before photocatalytic reaction; (b) after photocatalytic reaction.
